# Supplementary material for: Epstein-Barr virus ensures B cell survival by uniquely modulating apoptosis at early and late times after infection
Source: eLife. 2017 Apr 20;6:e22509. doi: 10.7554/eLife.22509 (PMC5425254; doi:10.7554/eLife.22509)
Supplement: Figure 1—source data 1. — DOI: http://dx.doi.org/10.7554/eLife.22509.004 [file elife-22509-fig1-data1.xlsx]

## Sheet: Fig 1
C)
	B cells
	FCCP	Bim 3	Bim 1	Puma 100	Puma 30	Puma 10	Bad	Noxa	Hrk	Bmf	Puma 2A
Donor 1	100	92	78.7	86.7	60.3	35.5	33.5	34.1	59.8	97.6	4.2
Donor 2	100	91.6	74.8	69.4	54.5	27.3	53.9	-7.1	-15.6	70.3	65
Donor 3	100	85.8	67.9	68	57.2	40.7	62.2	-6.6	-6.3	65	14.2
Donor 4
Donor 5	100	93.5	88.3	88.9	86.7	87.3	90.9	0.5	47.8	90.9	-1
	Prolif
	FCCP	Bim 3	Bim 1	Puma 100	Puma 30	Puma 10	Bad	Noxa	Hrk	Bmf	Puma 2A
Donor 1	100	100	96.8	88.2	41.7	-12.1	-10.5	25.5	13	85.5	-5.8
Donor 2
Donor 3	100	97.5	84.2	89.2	64.6	17.1	37.4	3.7	10.6	58.8	10.3
Donor 4	100	97.2	81.7	89.6	64.5	20.1	38.4	-21.5	-9.6	53.5	15.6
Donor 5	100	94.8	85.4	106.1	93.2	79.8	44.9	13.3	34.6	83.3	28
	LCL
	FCCP	Bim 3	Bim 1	Puma 100	Puma 30	Puma 10	Bad	Noxa	Hrk	Bmf	Puma 2A
Donor 1	100	90.7	65.5	72.4	39.7	15	-0.1	-5.6	-8.7	25.2	-11.9
Donor 2	100	87	46.4	67.6	26.6	-2.3	27.6	-13.3	-23.2	14.6	-7.9
Donor 3	100	91.4	53.6	84.7	62	22.6	30	8.7	6.2	39.2	16
Donor 4	100	76.9	35	73.1	35.2	0.4	26.9	-4.2	21.6	39.4	18
Donor 5	100	92.5	65.3	99.9	93	78.7	27.5	2.9	11.4	64.7	6.1
	B Cell					Prolif					LCL
FCCP	100	100	100		100	100		100	100	100	100	100	100	100	100
BIM 3	92	91.6	85.8		93.5	100		97.5	97.2	94.8	90.7	87	91.4	76.9	92.5
BIM 1	78.7	74.8	67.9		88.3	96.8		84.2	81.7	85.4	65.5	46.4	53.6	35	65.3
Puma	86.7	69.4	68		88.9	88.2		89.2	89.6	106.1	72.4	67.6	84.7	73.1	99.9
Puma 30	60.3	54.5	57.2		86.7	41.7		64.6	64.5	93.2	39.7	26.6	62	35.2	93
Puma 10	35.5	27.3	40.7		87.3	-12.1		17.1	20.1	79.8	15	-2.3	22.6	0.4	78.7
Bad	33.5	53.9	62.2		90.9	-10.5		37.4	38.4	44.9	-0.1	27.6	30	26.9	27.5
Noxa	34.1	-7.1	-6.6		0.5	25.5		3.7	-21.5	13.3	-5.6	-13.3	8.7	-4.2	2.9
Hrk	59.8	-15.6	-6.3		47.8	13		10.6	-9.6	34.6	-8.7	-23.2	6.2	21.6	11.4
Bmf	97.6	70.3	65		90.9	85.5		58.8	53.5	83.3	25.2	14.6	39.2	39.4	64.7
Puma 2A	4.2	65	14.2		-1	-5.8		10.3	15.6	28	-11.9	-7.9	16	18	6.1
