# Supplementary material for: Epstein-Barr virus ensures B cell survival by uniquely modulating apoptosis at early and late times after infection
Source: eLife. 2017 Apr 20;6:e22509. doi: 10.7554/eLife.22509 (PMC5425254; doi:10.7554/eLife.22509)
Supplement: Figure 1—source data 2. — DOI: http://dx.doi.org/10.7554/eLife.22509.005 [file elife-22509-fig1-data2.xlsx]

## Sheet: Fig 1 Fig Supp 1
	Bim 1				Puma 10				Bad				Bmf
	B cell	Prolif	LCL		B cell	Prolif	LCL		B cell	Prolif	LCL		B cell	Prolif	LCL
Donor 1	78.7	96.8	65.5		35.5	-12.1	15		33.5	-10.5	-0.1		97.6	85.5	25.2
Donor 2	74.8		46.4		27.3		-2.3		53.9		27.6		70.3		14.6
Donor 3	67.9	84.2	53.6		40.7	17.1	22.6		62.2	37.4	30		65	58.8	39.2
Donor 4		81.7	35			20.1	0.4			38.4	26.9			53.5	39.4
Donor 5	88.3	85.4	65.3		87.3	79.8	78.7		90.9	44.9	27.5		90.9	83.3	64.7
