# Supplementary material for: Epstein-Barr virus ensures B cell survival by uniquely modulating apoptosis at early and late times after infection
Source: eLife. 2017 Apr 20;6:e22509. doi: 10.7554/eLife.22509 (PMC5425254; doi:10.7554/eLife.22509)
Supplement: Figure 2—source data 1. — DOI: http://dx.doi.org/10.7554/eLife.22509.008 [file elife-22509-fig2-data1.xlsx]

## Sheet: Fig 2
B)
nM	PBMC Day 0							PBMC Day 3.5							LCL											NonProlif
0	100	100		100	100	100		100	100		100	100	100		100	100	100	100	100	100	100	100	100	100	100
1	80.1378	82.9564		82.803	90.0538	92.5694		86.6634	84.8023		192.398	106.221	97.8892		106.105	97.3852	100.595	101.211	88.3	98.3	98.9	96.3	98.9605	99.3046	104.417
5	49.1074	67.2961		46.5132	68.2796	68.0394		98.969	97.2176		203.509	94.9309	99.912		104.361	95.0072	95.2381	99.4616					100.208	102.643	102.12
10	38.3188	54.9768		42.7894	43.2796	78.1558		90.6961	88.0797		176.17	91.9355	89.27		99.7093	89.1445	91.0119	98.9233					98.3368	101.808	104.417
50	22.1535	31.189		15.0305	18.8172	45.658		86.639	97.8606		183.772	76.7281	108.971		107.267	84.3451	76.6191	94.4818					97.7131	104.172	99.2933
100	13.9162	25.8491		10.088	11.828	23.0081		83.9241	90.1849		154.971	76.4977	107.124		106.686	80.8651	61.4167	89.3674	92.8	94.3	85.3	95.3	96.2578	98.331	97.8799
1000	1.41974	4.86961		1.28639	0.806452	1.61146		63.7728	59.4652		121.345	38.0184	76.781		93.4244	49.5892	16.0268	74.0242					84.8233	92.6286	81.6254
10000	0.0281136	0.16601		0	0.268817	0.268576		28.6255	29.4737		84.5029	22.8111	37.2032		44.4157	21.6916	13.7798	37.6743	35.1	42.3	21	18.3	51.1435	43.6718	38.3392
100000	0	0		0	0	0		0	0		0	0	0		0	0	0	0	0	0	0	0	0	0	0
C)
	Mean	Upper limit	Lower limit
Concurrent Infection	10.4	12.8	8.3
Prolif	1894	2828	1269
LCL	3728	4944	2811
D)
	DMSO			100 nM ABT-737			1000 nM ABT-737
B Cell	22.8	12.1	15.9	79.3	80.9	87.5	93.6	93.7	98.3
Prolif	3.72	2.23	1.78	4.68	4.42	3.98	8.73	8.33	6.6
LCL	1.24	3.38	1.5	2.32	5.53	1.74	2.52	24.5	0.028
E)
	DMSO			100 nM ABT-737			1000 nM ABT-737
B Cell	23.6	11.8	15.5	75.3	81	84.5	84	94.3	96.8
Prolif	5.2	4.11	2.32	8.87	8.91	4.86	13.3	11.8	7.82
LCL	2.18	6.33	3.11	4.33	10	2.88	6.33	14	3.13
F)
nM	PBMC Day 0			PBMC Day 3.5			LCL
0	100	100		100	100		100	100	100
0.1	96.9433	104.052		85.5749	100.203		97.9853	93.1818	98.7654
1	58.1783	75.7747		84.4167	92.5513		104.396	101.299	99.2945
50	27.3331	30.3039		81.995	88.2442		97.0696	92.8571	90.2998
10	38.9425	42.2527		92.1452	107.905		98.3517	94.4805	96.649
500	10.5751	13.2598		80.5279	90.5751		96.5202	90.5844	88.8889
100	16.8661	19.6663		81.4755	86.4454		93.4066	83.7662	87.478
1000	10.8993	14.8093		87.8773	102.99		91.2088	85.0649	91.358
5000	8.599	10.1609		84.5781	113.555		80.7692	82.7922	73.7213
10000	4.70861	6.91299		55.6718	84.0132		29.3938	19.4903	15.254
100000	0	0		0	0		0	0	0
G)
	Mean	Upper limit	Lower limit
Concurrent Infection	7.567	13.2	4.35
Prolif	11058	16127	7582
LCL	6896	9574	4967
