# Supplementary material for: Epstein-Barr virus ensures B cell survival by uniquely modulating apoptosis at early and late times after infection
Source: eLife. 2017 Apr 20;6:e22509. doi: 10.7554/eLife.22509 (PMC5425254; doi:10.7554/eLife.22509)
Supplement: Figure 3—source data 1. — DOI: http://dx.doi.org/10.7554/eLife.22509.010 [file elife-22509-fig3-data1.xlsx]

## Sheet: Fig 3
A)
	MCL-1			BCL-2			BFL-1
B Cell	1	1	1	1	1	1	1	1	1
Day 7 Prolif	5.62849	3.81313	2.836	0.821106	0.570175	0.369	0.635862	0.496698	0.615
LCL	13.307	6.59737	1.95	1.56998	1.24576	0.342	2.2818	0.954379	3.4247
C)
	MCL-1			BCL-2
B cell	0.105546	0.170183	0.123707	1.0017	1.54952	0.948805
Prolif	0.523089	0.713861	0.693918	0.301638	0.912684	1.07223
LCL	0.104005	0.126165	0.162726	0.958717	0.707816	1.74496
D)
	Day 7 Prolif			LCL
DMSO	4.29	4.52	3.76	3.33	5.78	3.64
1uM ABT-737	14.3	9.83	12.1	3.42	4.1	6.47
5uM A1210	10.6	6.9	6.61	3.3	5.05	4.37
Both	22.3	13.6	13.3	5.16	5.71	11.4
E)
	Day 7 Prolif			LCL
DMSO	3.23	2.64	6.72	4.59	12.7	3.95
1uM ABT-199	8.29	4.97	16.3	5.39	13.6	5.4
5uM A1210	8.25	4.99	13.1	4.89	15.2	5.5
Both	20.6	8.04	23.4	6.88	15.4	6.16
G)
WT				Cas9				AAV				Bfl1sg1 clones
Rel levels	1	1		0.828156	0.795958			0.784865	0.896608			0.297463	0.316381	0.379427
H)
	WT				Cas9				AAV				Bfl1sg1
Untreated	4.11	4.63	3.33		3.6	5.76	2.78		4.12	4.19	2.39		5.72	5.35	5.56	4.79
1uM ABT-737	9.57	6.61	3.42		5.79	7.17	3.39		9.5	8.53	3.96		16.2	15.1	14.5	11.1
5uM A1210	4.49	5.11	3.3		4.68	5.73	3.94		4.3	4.18	3.71		7.46	7.45	7.17	5.24
Both	12.4	9.1	5.16		9.69	9.4	6.01		12.4	10.1	3.96		22.8	24.3	21.5	15.8
