# Supplementary material for: Epstein-Barr virus ensures B cell survival by uniquely modulating apoptosis at early and late times after infection
Source: eLife. 2017 Apr 20;6:e22509. doi: 10.7554/eLife.22509 (PMC5425254; doi:10.7554/eLife.22509)
Supplement: Figure 3—source data 2. — Source data for mRNA levels and apoptosis assays for cells treated with flavoporidol. DOI: http://dx.doi.org/10.7554/eLife.22509.011 [file elife-22509-fig3-data2.xlsx]

## Sheet: Fig 3 Fig Supp 1
A)
Sample	Target	BFL1	MCL-1	BCL2
	0hr	1	1	1
	2hr	0.859266	0.309644	0.734725
	4hr	0.830963	0.405117	1.14793
C)
	Day 7 Prolif				LCL
DMSO	4.63307	3.67505	4.82986	5.35869	0.96063	2.20321	1.57746	2.34842
1uM ABT-737	10.8696	16.2581	13.0634	15.5146	1.52066	4.27933	2.2973	4.64878
100nM Flav	5.37791	5.84844	4.25532	6.34807	1.2234	4.28708	1.51724	3.44444
Both	20.544	38.4083	19.7384	33.8906	4.02817	20.6304	3.72667	15.9458
