# Supplementary material for: Epstein-Barr virus ensures B cell survival by uniquely modulating apoptosis at early and late times after infection
Source: eLife. 2017 Apr 20;6:e22509. doi: 10.7554/eLife.22509 (PMC5425254; doi:10.7554/eLife.22509)
Supplement: Figure 4—source data 1. — DOI: http://dx.doi.org/10.7554/eLife.22509.014 [file elife-22509-fig4-data1.xlsx]

## Sheet: Fig 4
E)
	Mean	Upper limit	Lower limit
CpG	209	444	99
CD40L/IL-4	137	181	104
EBV	3712	4615	2985
F)	% Caspase 3/7 Activity
	0			100			1000
CpG	50	32	26.2	56.1	55.9	46.2	66.2	72.6	62.8
CD40L/IL4	14.7	9.55	13.8	39.2	20.2	31.9	55.6	41.7	66.3
G)	% Annexin
	0			100			1000
CpG	47.1	38.2	28.7	61.7	64.5	56.4	72.3	81.8	71.1
CD40L/IL4	22.3	12	19.1	56.1	22.5	37.8	63	52.6	71.3
