# Supplementary material for: Epstein-Barr virus ensures B cell survival by uniquely modulating apoptosis at early and late times after infection
Source: eLife. 2017 Apr 20;6:e22509. doi: 10.7554/eLife.22509 (PMC5425254; doi:10.7554/eLife.22509)
Supplement: Figure 5—source data 1. — DOI: http://dx.doi.org/10.7554/eLife.22509.016 [file elife-22509-fig5-data1.xlsx]

## Sheet: Fig 5
B)
	B95-8				B95-8 + CpG				P3HR1 + CpG				CpG
1	100	100	100		100	100	100		100	100	100		100	100	100
10	101.311	105.755	95.7708		90.9319	93.7469	95.881		87.5357	76.2047	89.4186		83.7648	78.6266	75.8521
100	88.869	88.3843	86.9031		89.1784	84.7096	94.2792		69.3539	61.3747	52.5969		64.6336	55.6193	39.5725
1000	75.8908	74.55	78.2823		93.7291	81.7455	95.881		41.2807	40.7919	30.8915		33.5673	42.5922	23.0791
10000	35.9433	28.7987	27.3241		49.4239	32.0454	33.9931		34.4768	19.6862	34.8837		31.8122	22.4774	25.6788
30000	20.379	19.1921	12.7915		15.9068	6.95791	5.91075		23.6707	7.02279	18.2171		25.2742	7.86045	16.0312
100000	0				0				0				0
C)
	Wp				Cp				EBNA2				BHRF1				EBNA3A				EBNA3C
	B95-8	P3HR1	LCL		B95-8	P3HR1	LCL		B95-8	P3HR1	LCL		B95-8	P3HR1	LCL		B95-8	P3HR1	LCL		B95-8	P3HR1	LCL
	426	143	100		15.66	0.83	100		87	0.24	100		16.7	18.68	100		81.86	1.12	100		43.62	0.37	100
	512	370	100		17.37	1.7	100		19	0.73	100		2.09	12.17	100		55.84	0.75	100		35.17	0.29	100
																	75.73	0.73
																	52.37	0.67
D)
	B95-8						D3A						D3C
1	100	100	100				100	100	100	100	100	100	100	100		100	100	100
10	92.5249	90.1911	89.5793				68.2819	72.7034	113.305	88.8626	92.112	77.2881	107.936	115.271		99.4273	75.6168	94.9074
100	96.4115	71.23	76.4246				50.2203	82.8084	66.0944	52.9621	63.1043	47.4576	93.6508	122.496		83.4192	52.0682	80.3241
1000	76.9271	41.4559	73.2469				12.3348	39.895	23.176	38.981	33.5878	33.5593	57.1429	81.445		59.8225	23.984	61.4583
10000	56.8208	28.3452	57.3052				13.6564	16.7979	12.4464	28.7915	21.1196	28.4746	94.8413	42.0361		37.3998	13.7155	43.0556
100000	0						0						0
E)
	B958			D3A
0	100	100	100	100	100	100
10	103.027	113.513	107.781	69.0138	68.178	72.3151
100	118.008	106.725	109.04	43.6899	37.944	42.2482
1000	94.0921	109.029	102.679	15.9632	15.5453	16.9244
10000	51.7551	59.8247	65.0058	4.03259	4.72211	4.84747
30000	1.83194	2.85468	3.31548	0.376097	0.313414	0.564145
100000	0			0
