# Supplementary material for: Epstein-Barr virus ensures B cell survival by uniquely modulating apoptosis at early and late times after infection
Source: eLife. 2017 Apr 20;6:e22509. doi: 10.7554/eLife.22509 (PMC5425254; doi:10.7554/eLife.22509)
Supplement: Figure 5—source data 2. — Source data for cell counts DOI: http://dx.doi.org/10.7554/eLife.22509.017 [file elife-22509-fig5-data2.xlsx]

## Sheet: Fig 5 Fig Supp 1
A)
	DMSO		Day 0		Day 1		Day 2		Day 3
0	0	0	0	0	0	0	0	0	0	0
1	0.426712	0.914897	0.34137	1.45003	0.426712	0.914897	0.426712	0.914897	0.426712	0.914897
3	3.49904	6.36976	2.43226	1.65717	1.53616	2.45123	3.07233	4.45365	3.49904	6.36976
4	22.7224	16.2783	3.92575	4.48818	10.4544	7.45728	22.6157	17.0205	18.7753	17.5039
6	100	100	14.5509	11.1859	47.4077	20.5766	103.051	58.8987	127.118	57.276
B)
DMSO	Day 0	Day 1	Day 2	Day 3
100	14.55	47.4	103	127
100	11.18	20.57	58.89	57.27
C)
	WT							D3A
0	100	100	100	100	100	100		100	100	100	100	100	100
10	86.5	99	87.5	92	107	90		91	71.5	58.5	60	79	67.5
100	93.5	92	96	90.5	114	66		70.5	42	34.5	35	64.5	34.5
1000	84	67	87.5	94.5	84.5	87		52.5	45.5	37.5	35	38.5	43.5
10000	7.5	9	26	25	38.5	39		36	26.5	6	6.5	17	15
100000	0							0
