# Supplementary material for: Epstein-Barr virus ensures B cell survival by uniquely modulating apoptosis at early and late times after infection
Source: eLife. 2017 Apr 20;6:e22509. doi: 10.7554/eLife.22509 (PMC5425254; doi:10.7554/eLife.22509)
Supplement: Figure 6—source data 1. — DOI: http://dx.doi.org/10.7554/eLife.22509.020 [file elife-22509-fig6-data1.xlsx]

## Sheet: Fig 6
A)
	WT LCL		3A LCL
BAD	44.7	1.4	55	5.9
BMF	50.4	3.17	83.7	2.65
B)
	BCL-2				MCL-1				BFL-1
WT	152.22	81.5454	54.5361	111.699	107.124	118.758	59.1766	114.941	127.577	79.299	87.6216	105.503
D3A	128.39	136	237	170	92.98	124	223	188	20.54	9.11	14	11.95
D)
	WT LCL			D3A LCL
0	100	100		100	100
30	94.3	24.6		50.8	71.3
60	45.5	20.7		17.7	48.5
120	21.7	4.8		4.7	23.3
F)
WT LCL	D3A LCL
100	18.0511
100	13.1734
100	12.283
G)
	Pol II						Pol II Ser 5						H3K27ac						H3K9ac						H3K4me3
	WT LCL		D3A LCL				WT LCL		D3A LCL				WT LCL		D3A LCL				WT LCL		D3A LCL				WT LCL		D3A LCL
Myo	0.00197017	0.00130426	0.00297272	0.00146983		Myo	0.000395208	0.000823155	0.000873271	0.00130633		Myo	0.0243572	0.00224793	0.0127863	0.000993939		Myo	0.0219426	0.00308866	0.00610861	0.00188866		Myo	0.00449833	0.000378346	0.00777336	0.00313911
CXCL10	0.00553949	0.000347318	0.0171113	0.00139627		CXCL10	0.00115017	0.00128714	0.0147268	0.00184883		CXCL10	0.0239953	0.00233781	0.0713687	0.00801825		CXCL10	0.0496383	0.00715056	0.134788	0.0197276		CXCL10	0.0537592	0.00303664	0.0833562	0.0124144
miR221/222	0.0253328	0.00178001	0.00243384	0.000928626		miR221/222	0.0379815	0.00393725	0.00151509	0.000326536		miR221/222	0.0545044	0.00264845	0.0225703	0.00182497		miR221/222	0.158103	0.0111131	0.015724	0.0014854		miR221/222	0.189133	0.0252194	0.0732095	0.00583873
1	0.0074498	0.000581523	0.00598786	0.00260406		1	0.00644542	0.00100356	-0.000715706	0.00180111		1	0.0622565	0.0060462	0.0313301	0.0038623		1	0.102167	0.00612255	0.0258962	0.00102502		1	0.0257795	0.00175928	0.0163292	0.00184314
2	0.00259791	0.000220205	0.000589283	0.000474868		2	0.00129458	0.00147144	0.00291189	0.0015722		2	0.152855	0.0121197	0.0182749	0.000733197		2	0.369553	0.0527251	0.046266	0.0041388		2	0.0226488	0.00238444	0.00706622	0.000694782
TSS	0.0519081	0.0045753	0.0170706	0.00416094		TSS	0.0880181	0.0167194	0.0444839	0.00283609		TSS	0.498008	0.043971	0.153952	0.00749399		TSS	1.41033	0.0876548	0.404882	0.0133433		TSS	1.24839	0.13519	0.565086	0.0166826
3	0.00459317	0.000540651	0.0043274	0.00249864		3	0.00247995	0.000978869	0.00234268	0.000430892		3	0.239327	0.0218879	0.109454	0.0108011		3	1.72575	0.160547	0.666405	0.0706464		3	1.07645	0.129904	0.636268	0.0785268
4	0.005143	0.00251639	0.00311464	3.81797e-05		4	0.000964705	0.000911805	0.00190754	0.0022922		4	0.049337	0.00383015	0.037106	0.00403456		4	0.158783	0.0126003	0.08102	0.00561334		4	0.00883423	0.00352503	0.0090252	0.00211445
H)
	WT LCL		D3A LCL
+2	82.262		65.3572
+1	272.83		43.2455
-1	100		100
-3	986.235		265.775
-8	80.5255		39.3632
-12	1014.97		476.448
K)
	WT/Vector				D3A/Vector				D3A/EBNA3A
0	100	100	100		100	100	100		100	100	100	100
100	94.8767	107.44	73.8823		19.8817	15.7205	31.769		59.5745	73.8832	65.8113	81.8941
1000	97.7688	104.154	56.7267		5.79882	2.30817	5.41516		11.3475	55.6701	29.7185	23.9554
10000	50.1386	55.173	12.9881		2.24852	0.810979	1.08303		9.92908	16.1512	15.6457	13.3705
